# Supplementary material for: Zinc Polyaleuritate Ionomer Coatings as a Sustainable, Alternative Technology for Bisphenol A-Free Metal Packaging
Source: PubMed Central journal article supplement (PMC8611806; doi:10.1021/acssuschemeng.1c04815), 2021-11-03
Supplement: sc1c04815_si_001.pdf [file sc1c04815_si_001.pdf]

## SUPPLEMENTARY INFORMATION

### **Zinc polyaleuritate ionomer coatings as a sustainable, alternative technology for bisphenol A-free metal packaging**

*Davide Morselli<sup>1,2\*</sup>, Pietro Cataldi<sup>1,3</sup>, Uttam Chandra Paul<sup>1</sup>, Luca Ceseracciu<sup>4</sup>, Jose Jesus Benitez<sup>5</sup>, Alice Scarpellini<sup>6</sup>, Susana Guzman-Puyol<sup>1,7</sup>, Antonio Heredia<sup>8</sup>, Paola Valentini<sup>9</sup>, Pier Paolo Pompa<sup>9</sup>, David Marrero-López<sup>10</sup>, Athanassia Athanassiou<sup>1</sup>, and José Alejandro Heredia-Guerrero<sup>1,7\*</sup>*

<sup>1</sup> Smart Materials, Istituto Italiano di Tecnologia, Via Morego 30, 16163 Genova, Italy.

<sup>2</sup> Department of Civil, Chemical, Environmental and Materials Engineering (DICAM), Università di Bologna, Via Terracini 28, 40131 Bologna, Italy.

<sup>3</sup> Center for Nano Science and Technology @PoliMi, Istituto Italiano di Tecnologia, Via G. Pascoli 70/3, 20133 Milan, Italy

<sup>4</sup> Materials Characterization Facility, Istituto Italiano di Tecnologia, Via Morego 30, 16163 Genova, Italy.

<sup>5</sup> Instituto de Ciencia de Materiales de Sevilla, Centro mixto CSIC-Universidad de Sevilla, Americo Vespucio 49, Isla de la Cartuja, Sevilla, 41092, Spain.

<sup>6</sup> Electron Microscopy Facility, Istituto Italiano di Tecnologia, Via Morego, 30, Genova, 16163, Italy.

<sup>7</sup> Instituto de Hortofruticultura Subtropical y Mediterránea “La Mayora”, Universidad de Málaga-Consejo Superior de Investigaciones Científicas (IHSM, UMA-CSIC), Bulevar Louis Pasteur, 49, 29010 Málaga, Spain.

<sup>8</sup> Instituto de Hortofruticultura Subtropical y Mediterránea “La Mayora”, Universidad de Málaga-Consejo Superior de Investigaciones Científicas (IHSM, UMA-CSIC), Departamento de Biología Molecular y Bioquímica, Facultad de Ciencias, E-29071 Málaga, Spain.

<sup>9</sup> Nanobiointeractions & Nanodiagnostic, Istituto Italiano di Tecnologia, Via Morego 30, 16163 Genova, Italy.

<sup>10</sup> Universidad de Málaga, Dpto. de Física Aplicada I, 29071-Málaga, Spain.

\*Corresponding author: [davide.morselli6@unibo.it](mailto:davide.morselli6@unibo.it).

\*\*Corresponding author: [ja.heredia@csic.es](mailto:ja.heredia@csic.es). Number of pages: 5.

Number of figures: 4.

Number of tables: 0.

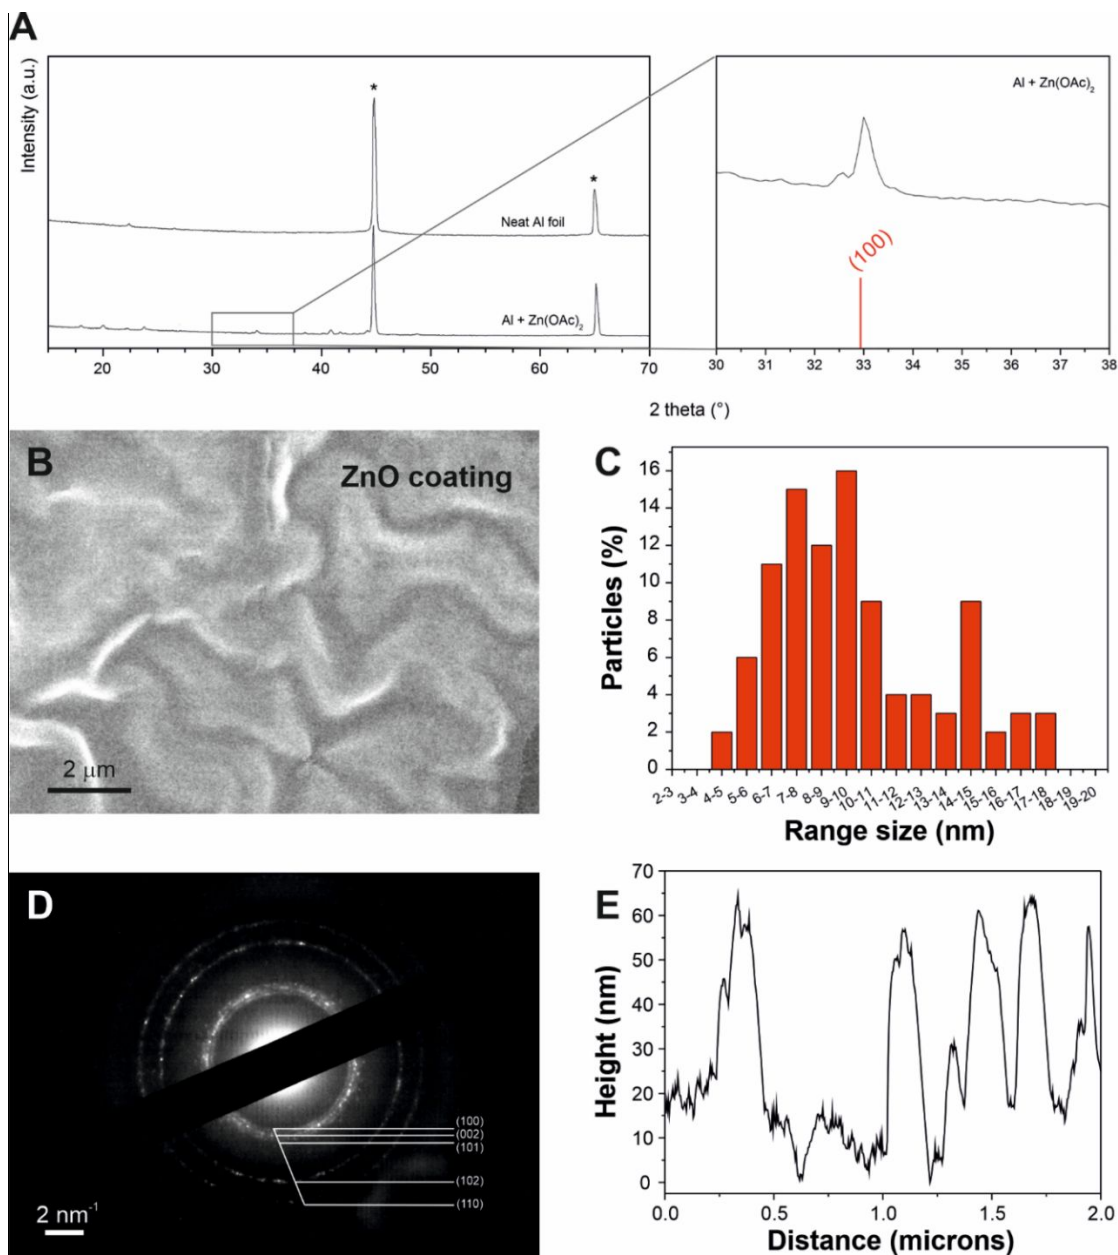

**Figure S1.** **A**, XRD diffractogram of the bare Al foil and Al/zinc acetate sample before the thermal treatment. (\*) indicates the reflections due to the aluminum foil used as substrate. On the right, the magnification of the range 30-38° (2θ) and the associated zinc acetate database pattern (JCPDS file 00-056-0569, in red) are shown. **B**, HR-SEM top-view image of the ZnO layer, fully covering the underneath aluminum substrate. **C**, particle size distribution of the synthesized ZnO NPs. **D**, electron diffraction (SEAD) patterns of the ZnO NPs observed by TEM. The assignment of main crystalline planes are included **E**, AFM height profile of the ZnO nanoparticles covering the aluminum substrate.

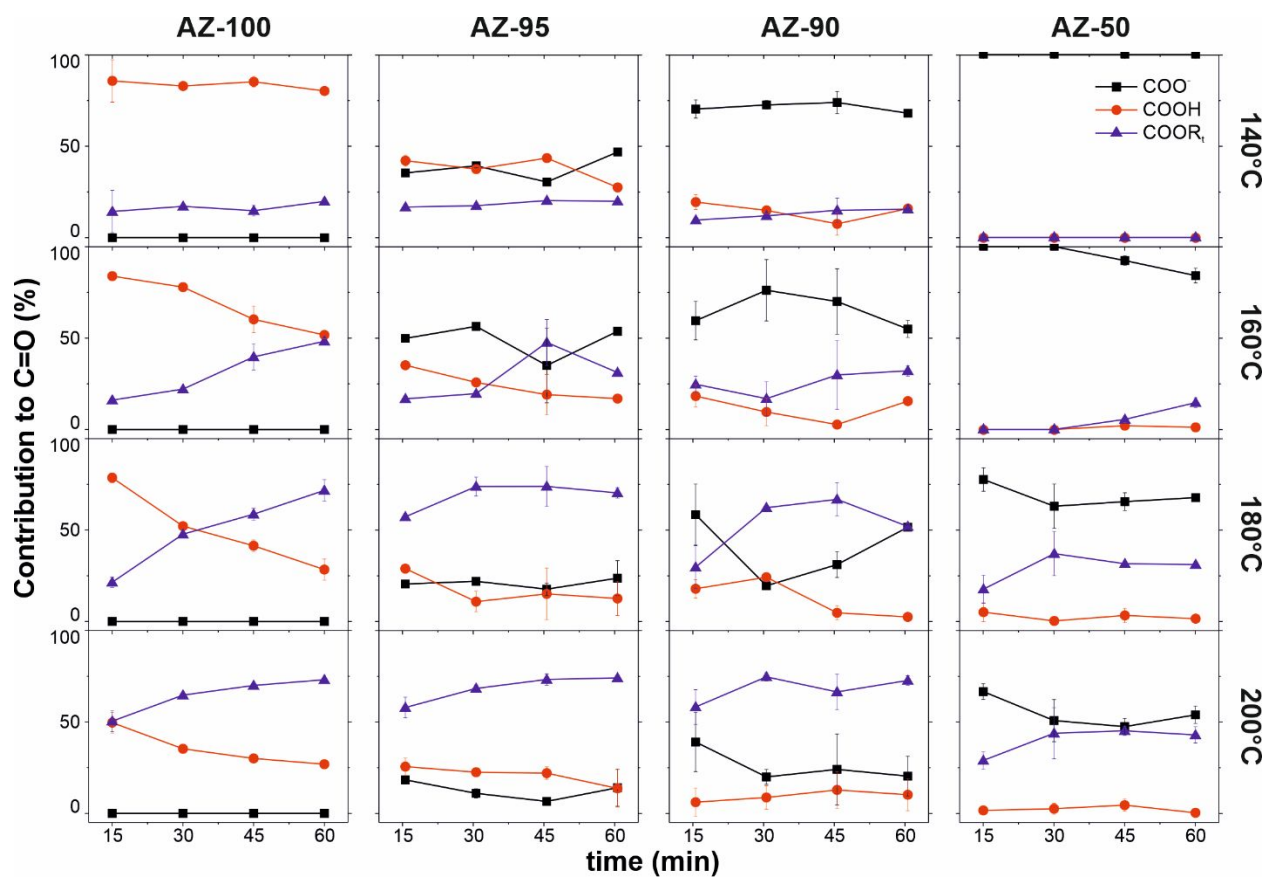

**Figure S2.** Contribution to the C=O stretching mode of carboxylate, carboxyl, and total ester groups of AZ-100 (first column), AZ-95 (second column), AZ-90 (third column), and AZ-50 (fourth column) at 140 (first row), 160 (second row), 180 (third row), and 200 (fourth row).

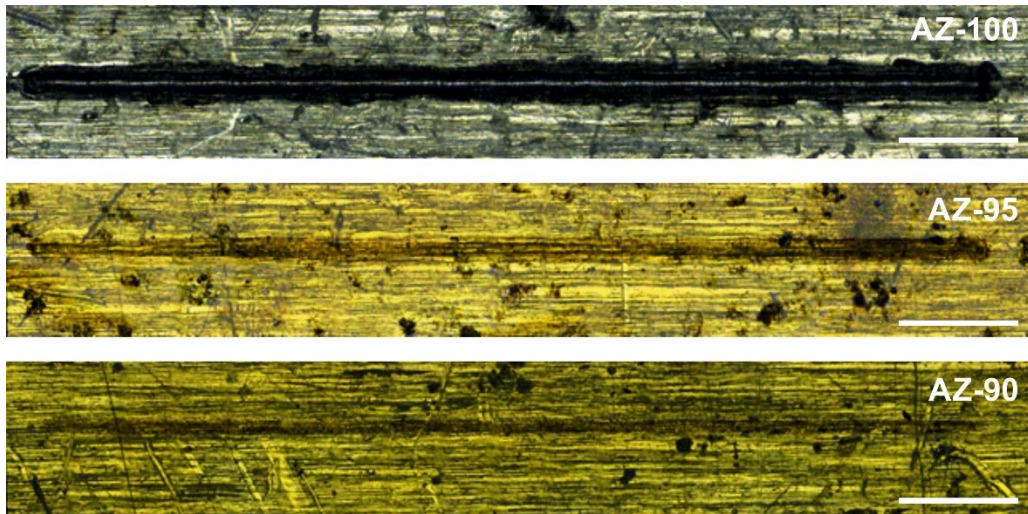

**Figure S3.** Scratch hardness scars of AZ-100, AZ-95, and AZ-90. Scale bar: 625  $\mu\text{m}$ .

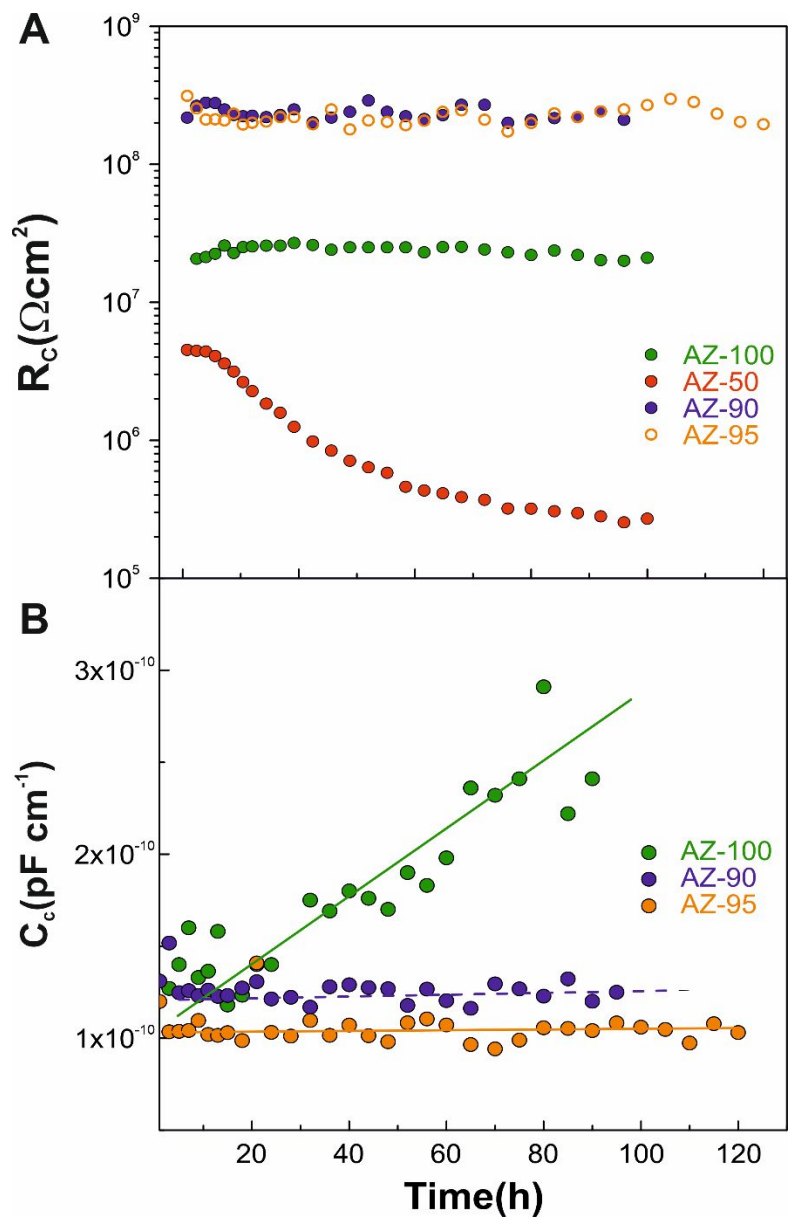

**Fig. S4. A, B,** variation of coating resistance and coating capacitance, respectively, over time.
